# Supplementary material for: Spatial transcriptomics uncover sucrose post-phloem transport during maize kernel development
Source: PubMed Central journal article supplement (PMC10632454; doi:10.1038/s41467-023-43006-7), 2023-11-08
Supplement: 41467_2023_43006_MOESM1_ESM.pdf [file 41467_2023_43006_MOESM1_ESM.pdf]

## SUPPLEMENTARY INFORMATION

### **Spatial Transcriptomics Uncover Sucrose Post-Phloem Transport During Maize Kernel Development**

Yuxin Fu<sup>1,2,3#</sup>, Wenxin Xiao<sup>1#</sup>, Lang Tian<sup>1</sup>, Liangxing Guo<sup>2</sup>, Guangjin Ma<sup>2,4</sup>, Chen Ji<sup>2,4</sup>, Yongcai Huang<sup>2,5</sup>, Haihai Wang<sup>2</sup>, Xingguo Wu<sup>1</sup>, Tao Yang<sup>2,5</sup>, Jiechen Wang<sup>2</sup>, Jirui Wang<sup>3,5</sup>, Yongrui Wu<sup>2\*</sup>, Wenqin Wang<sup>1\*</sup>

a. Developmental kernels at three time points

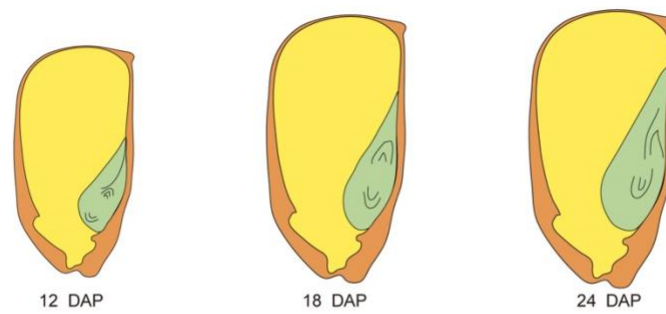

b. Experimental procedure

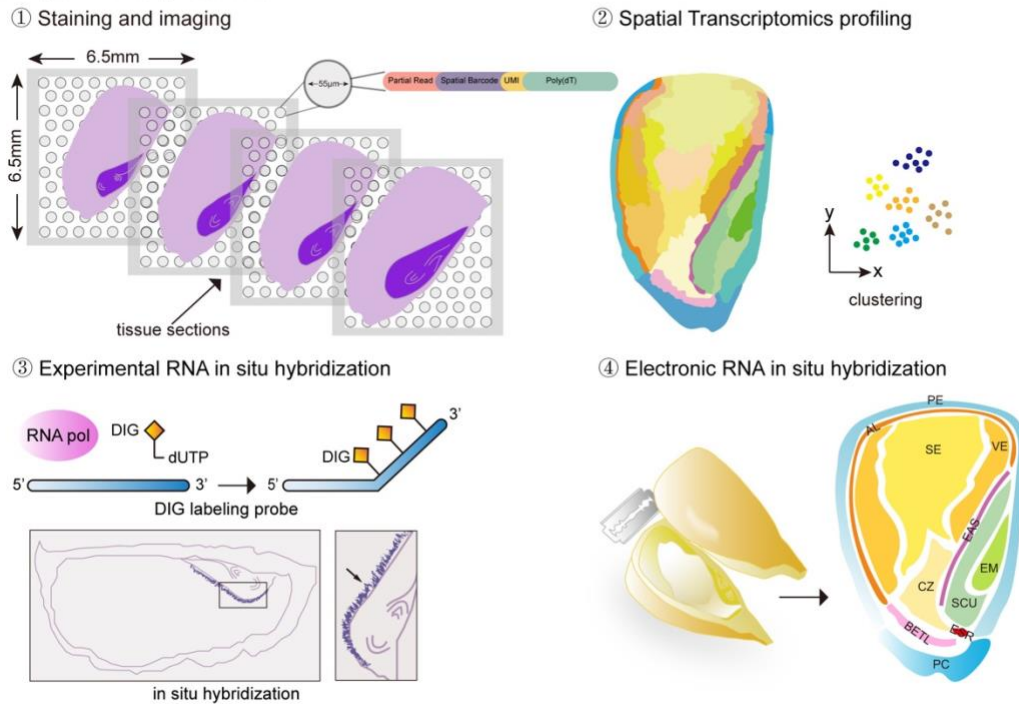

**Figure S1. Overview of the spatial transcriptomic study.**

a. Developmental kernels at three time points of filling stages are included. Time points are defined as 12, 18 and 24 days after pollination (DAP).

b. Experimental procedure: ① The sample is subjected to embed, section, fix, hematoxylin & eosin stain and image. The capture area of Visium chip has a side length of 6.5 mm. Each square area includes 5,000 barcoded spots with a diameter of 55 µm. Each spot contains millions of oligonucleotides that are unique to that spot; ② Spatial transcriptomics profiling includes library construction, sequencing and bioinformatically clustering; ③ Verification using RNA in situ hybridization; ④ Generating spatial gene expression atlas.

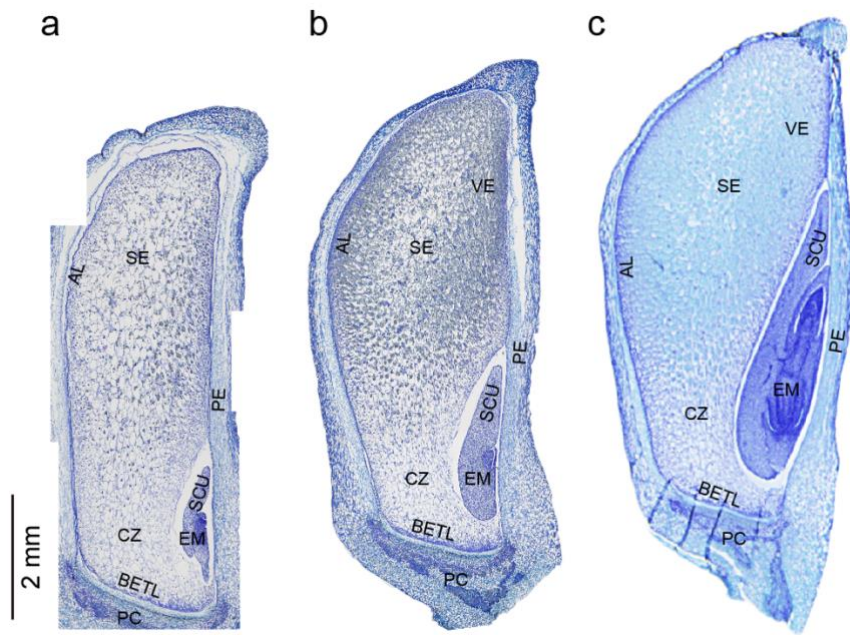

**Figure S2. Light microscopy of semi-thin kernels at 10, 14 and 18 DAP.**

a, 10 DAP; b, 14 DAP; c, 18 DAP.

The histological images show the maternal-derived regions: placento-chalazal (PC) and pericarp (PE); the endosperm compartments: basal endosperm transfer layer (BETL), conducting zone (CZ), starchy endosperm (SE), vitreous endosperm (VE), aleurone (AL); and the embryo regions: scutellum (SCU) and embryo meristem (EM). Scale bar is 2 mm.

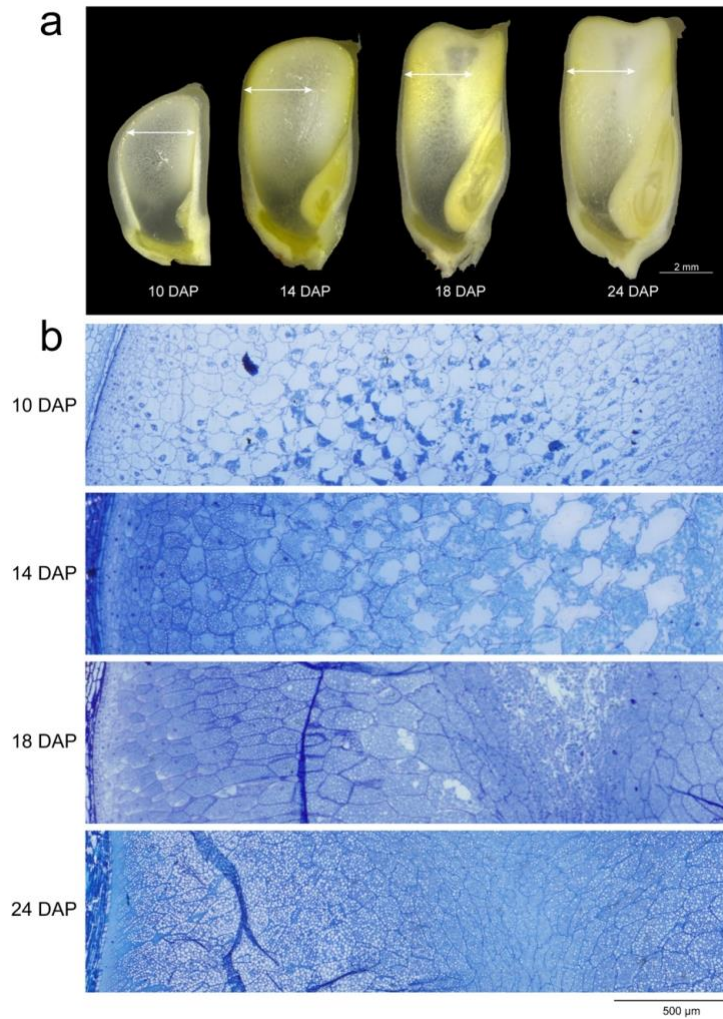

**Figure S3. Storage metabolite accumulation and cell size measurement during maize endosperm development**

a, Longitudinal free-hand sections of developing W64A kernels. The double-headed arrow line indicates the regions across the endosperm where semi-thin section is checked. Scale bar is 2 mm.

b, Light microscopy of semi-thin sections for the developing W64A endosperms at 10, 14, 18, 24 DAP. Scale bar is 500 μm.

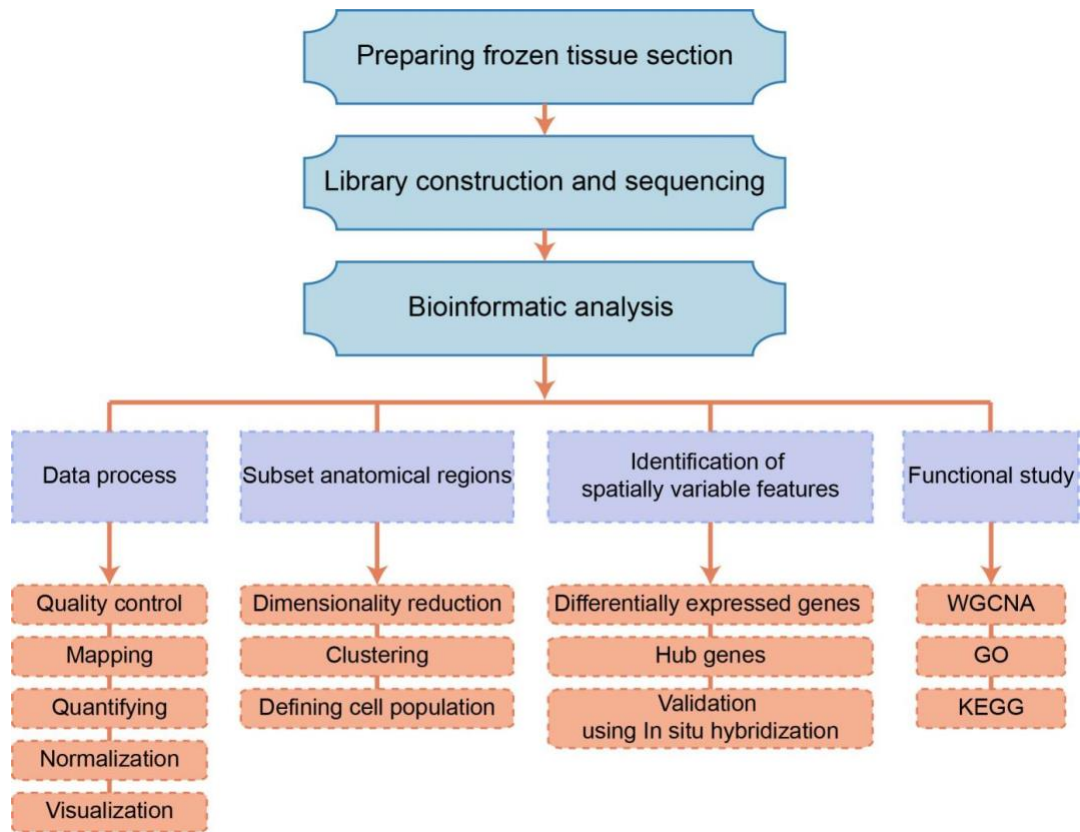

**Figures S4. The analysis pipeline for spatial transcriptomic study.**

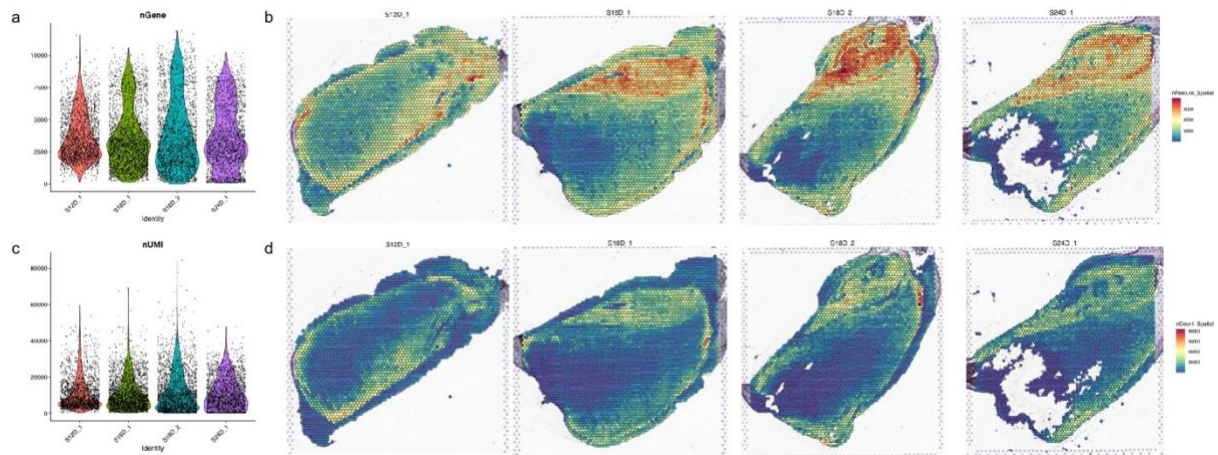

**Figure S5. The density of expressed genes and transcripts in a spot.**

a. The number of expressed genes in a spot.

The y-axis represents the number of genes expressed in a spot.

b. The spatial distribution of expressed genes on the sample sections.

c. The numbers of RNA molecules with Unique Molecular Identifiers (UMI) in a spot.

The y-axis represents the number of transcripts in a spot.

d. The spatial distribution of the unique transcripts in the sample sections.

The color changes gradually from green, yellow to red when the density gradually increases.

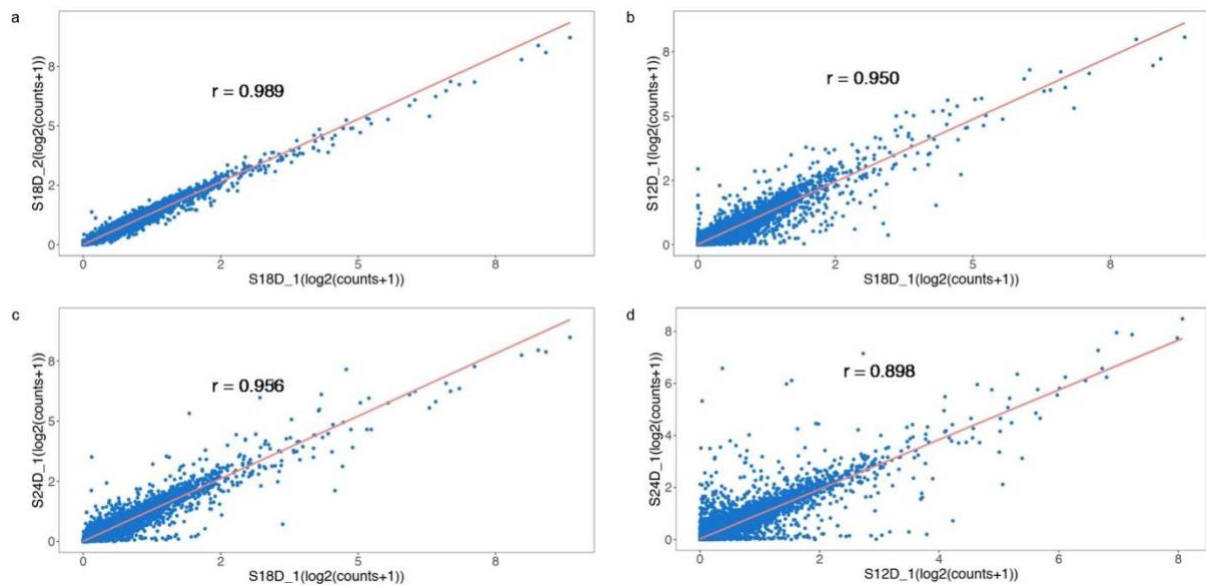

**Figure S6. Pearson correlation among samples.**

Scatterplot showing Pearson correlation between aggregated gene counts from samples. The biological replicates (S18D\_1 and S18D\_2) show the best correlation compared to what was observed for the other samples.

a. Scatterplot of S18D\_1 and S18D\_2.

b. Scatterplot of S18D\_1 and S12D\_1.

c. Scatterplot of S18D\_1 and S24D\_1.

d. Scatterplot of S12D\_1 and S24D\_1.

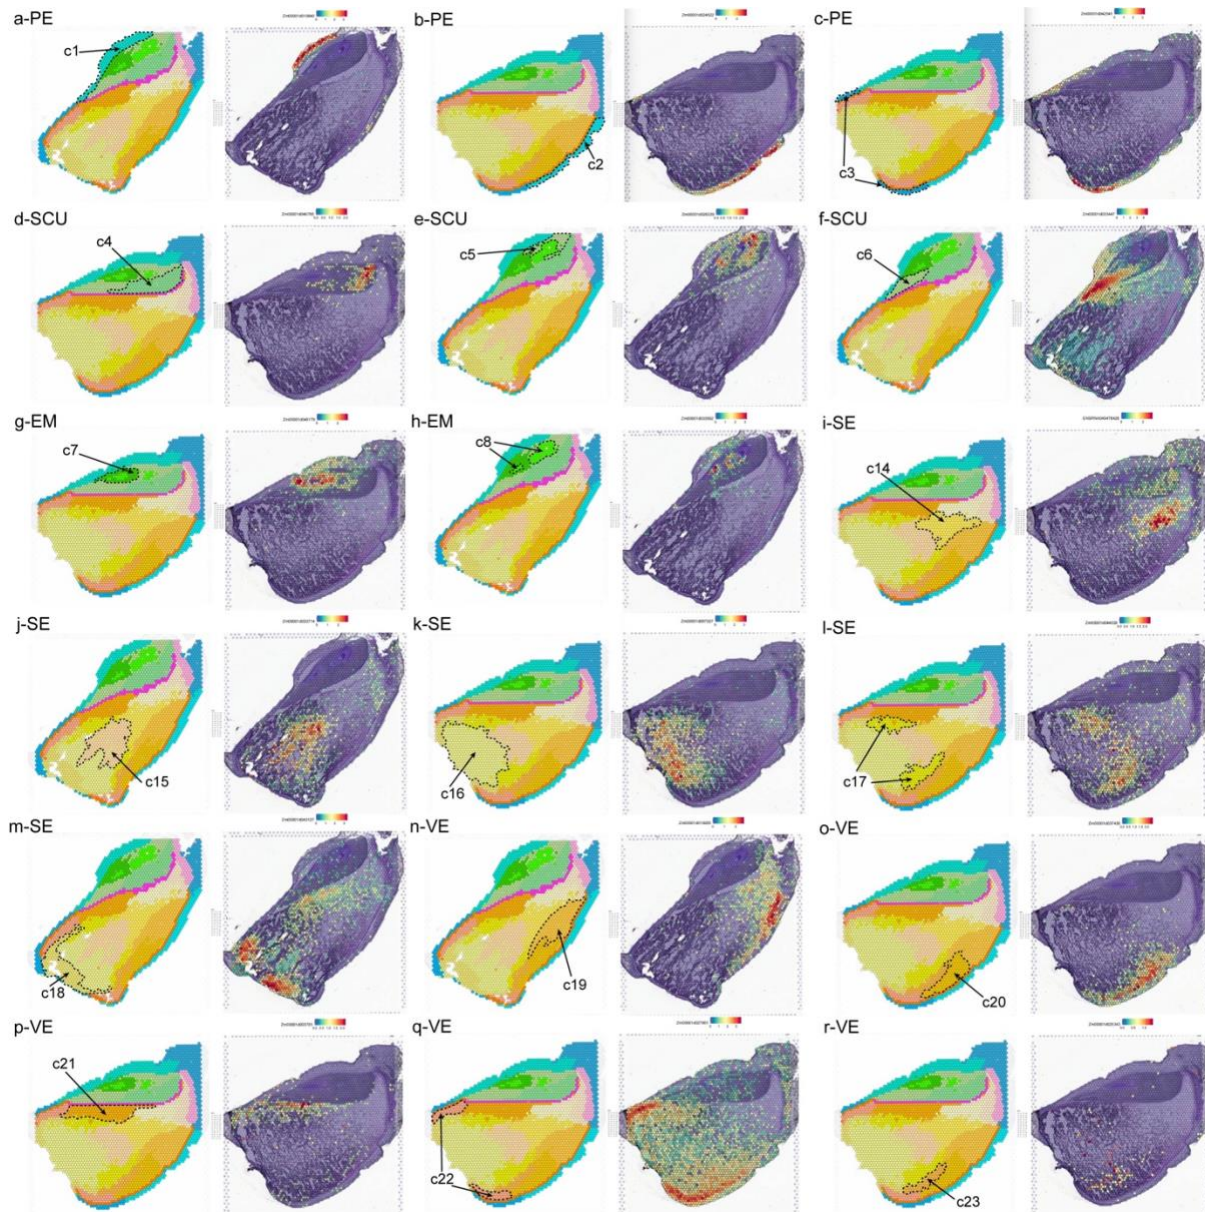

**Figure S7. Representatives of marker genes defined by spatial transcriptomic data in the tissues of pericarp, embryo and endosperm.**

The left panel (e.g., a-PE) provides an overview of the 25 cell populations, while the right panel (e.g., a-PE) displays a snapshot of the spatial expression of marker gene. The abbreviations PE, SCU, EM, SE, and VE correspond to pericarp, scutellum, embryo meristem, starchy endosperm, and vitreous endosperm, respectively.

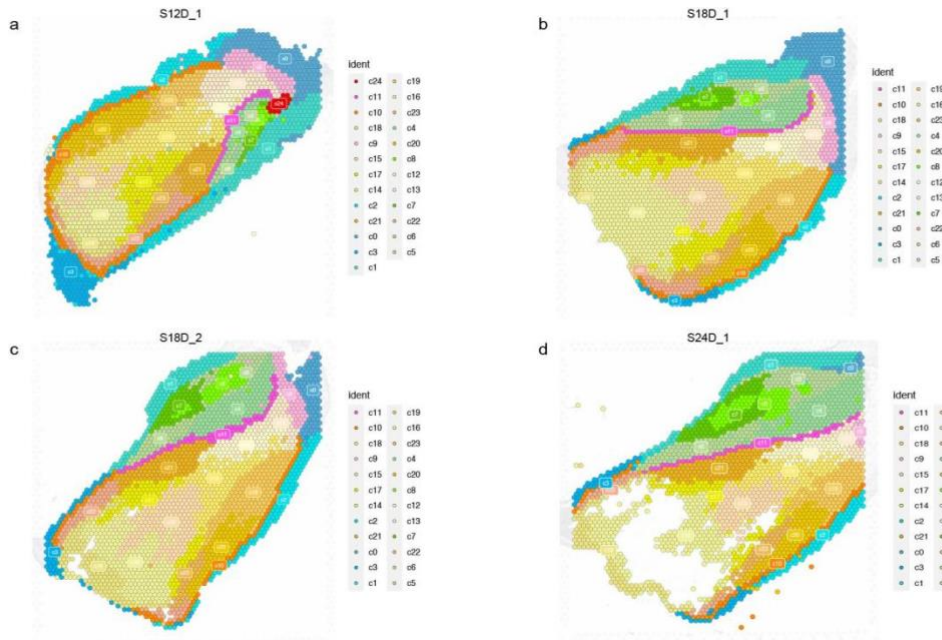

**Figure S8. The defined clusters after dimensional reduction.**

The 25 clusters from dimensional reduction are mapped back to tissue sections, showing their location on the kernel. Each dot in the figure represents a tissue spot containing one to three cells. The clusters are distinguished by different colors.

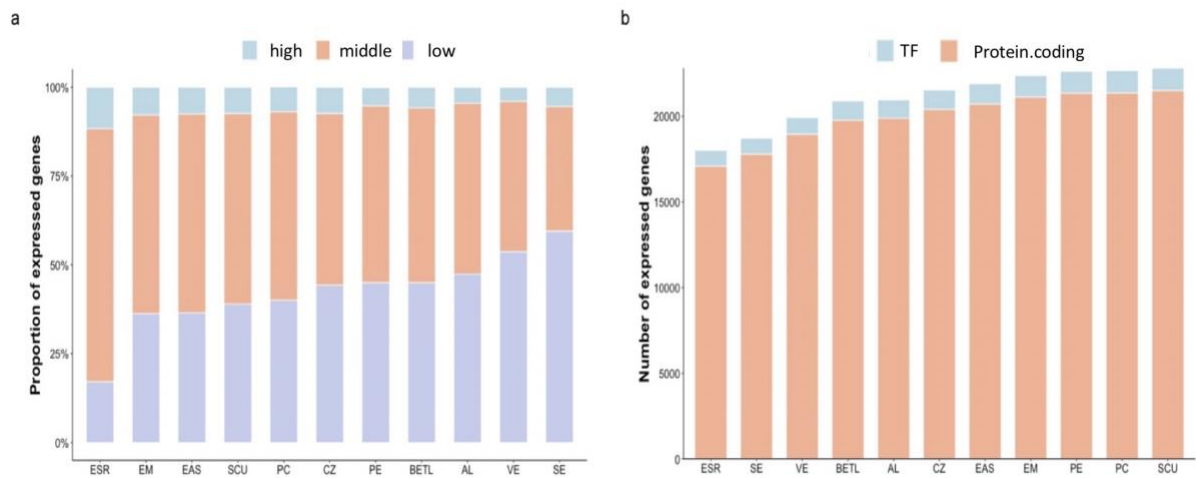

**Figure S9. Summary of gene expression in kernel compartments.**

a. The gene numbers expressed at different level (based on UMI index) in kernel compartments.  
 b. The gene numbers of protein coding genes and transcription factors (TF) in kernel compartments.



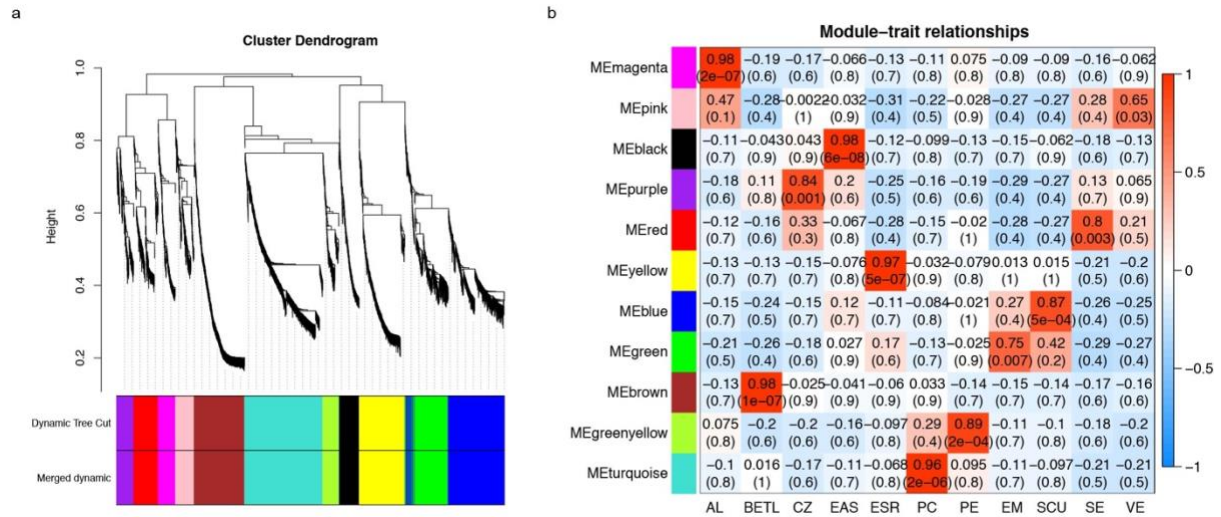

**Figure S10. The gene co-expression networks using WGCNA in maize kernel.**

a. Gene clustering dendrogram.

b. The correlations between detected modules and kernel compartments hierarchically clustered based on Euclidean distance. The progressively saturated red colors indicated higher overlap among the functional modules.

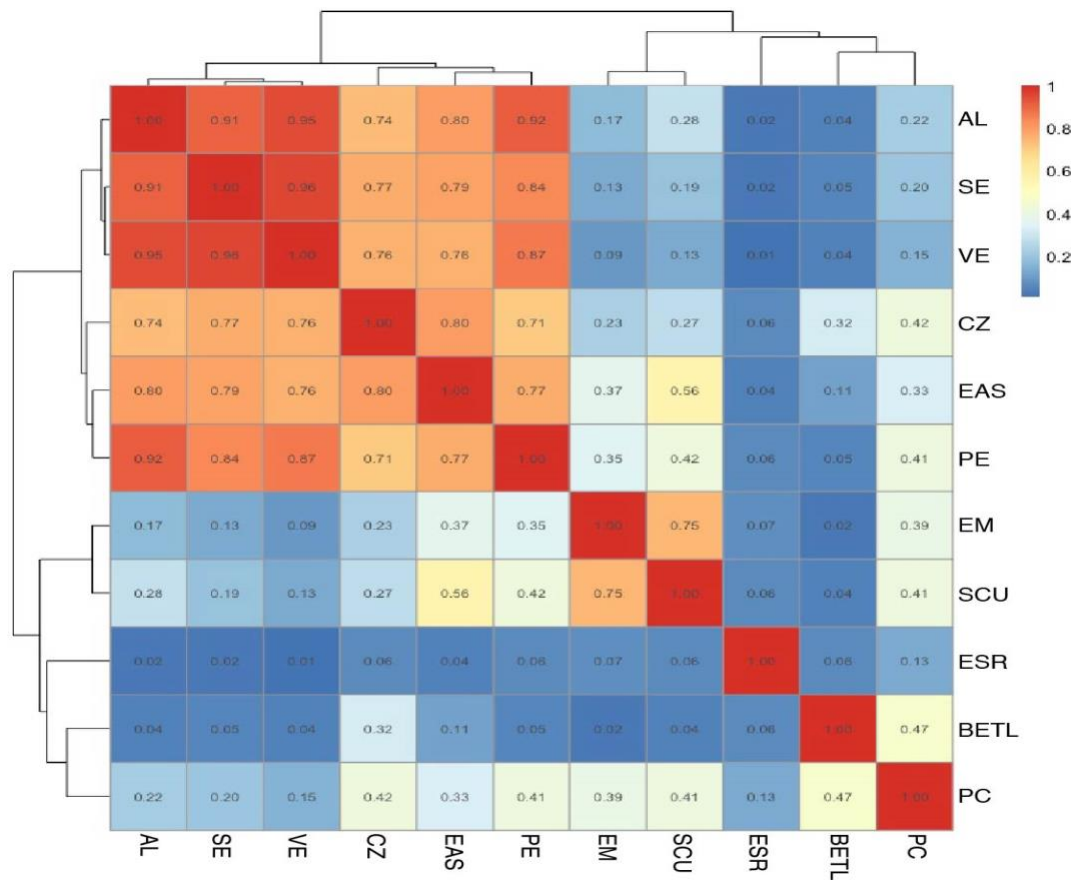

**Figure S11. Pairwise Pearson correlation analysis over kernel compartments.**

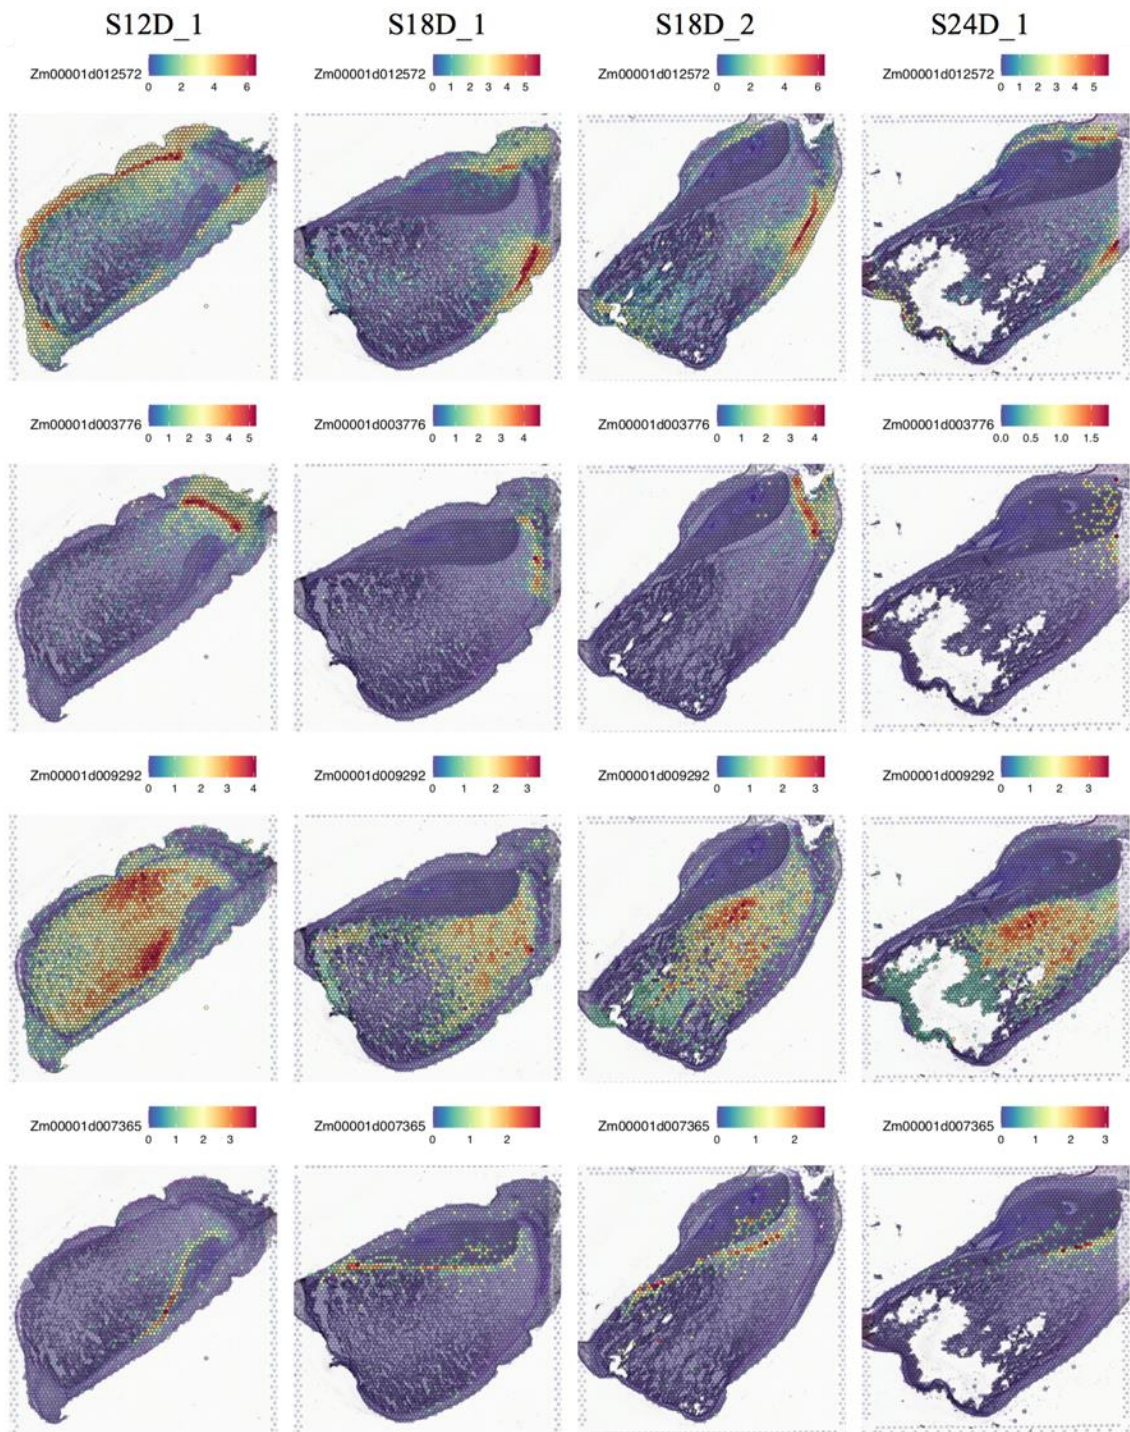

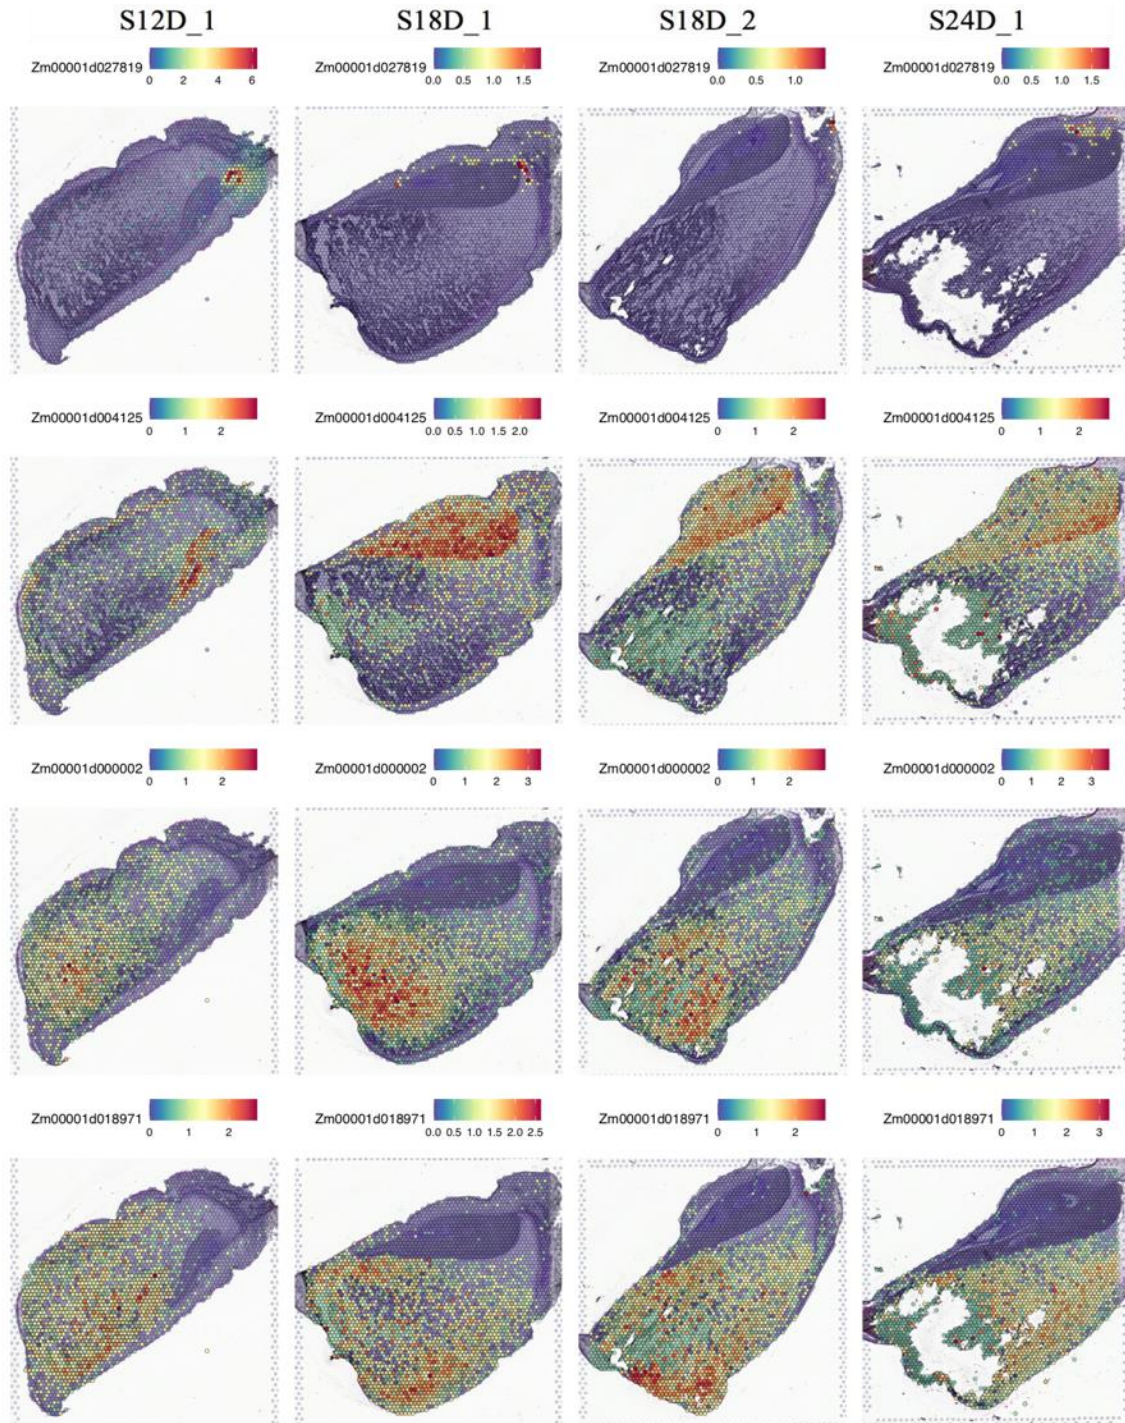

**Figure S12. Representatives of electronic RNA in situ hybridization using known markers that are consistent with the previous studies (Li, 2014; Zhan, 2015).**

We selected one marker from each compartment as following except EM, PC and PE due to unavailability from other research: AL9 in aleurone (Zm00001d012572); CWIN2 in BETL (Zm00001d003776); FL3 in CZ (Zm00001d009292); SWEET14a in EAS (Zm00001d007365); ESR2 in ESR (Zm00001d027819); ACCase in SCU (Zm00001d004125); SS2 in SE (Zm00001d000002); O2 in VE (Zm00001d018971).

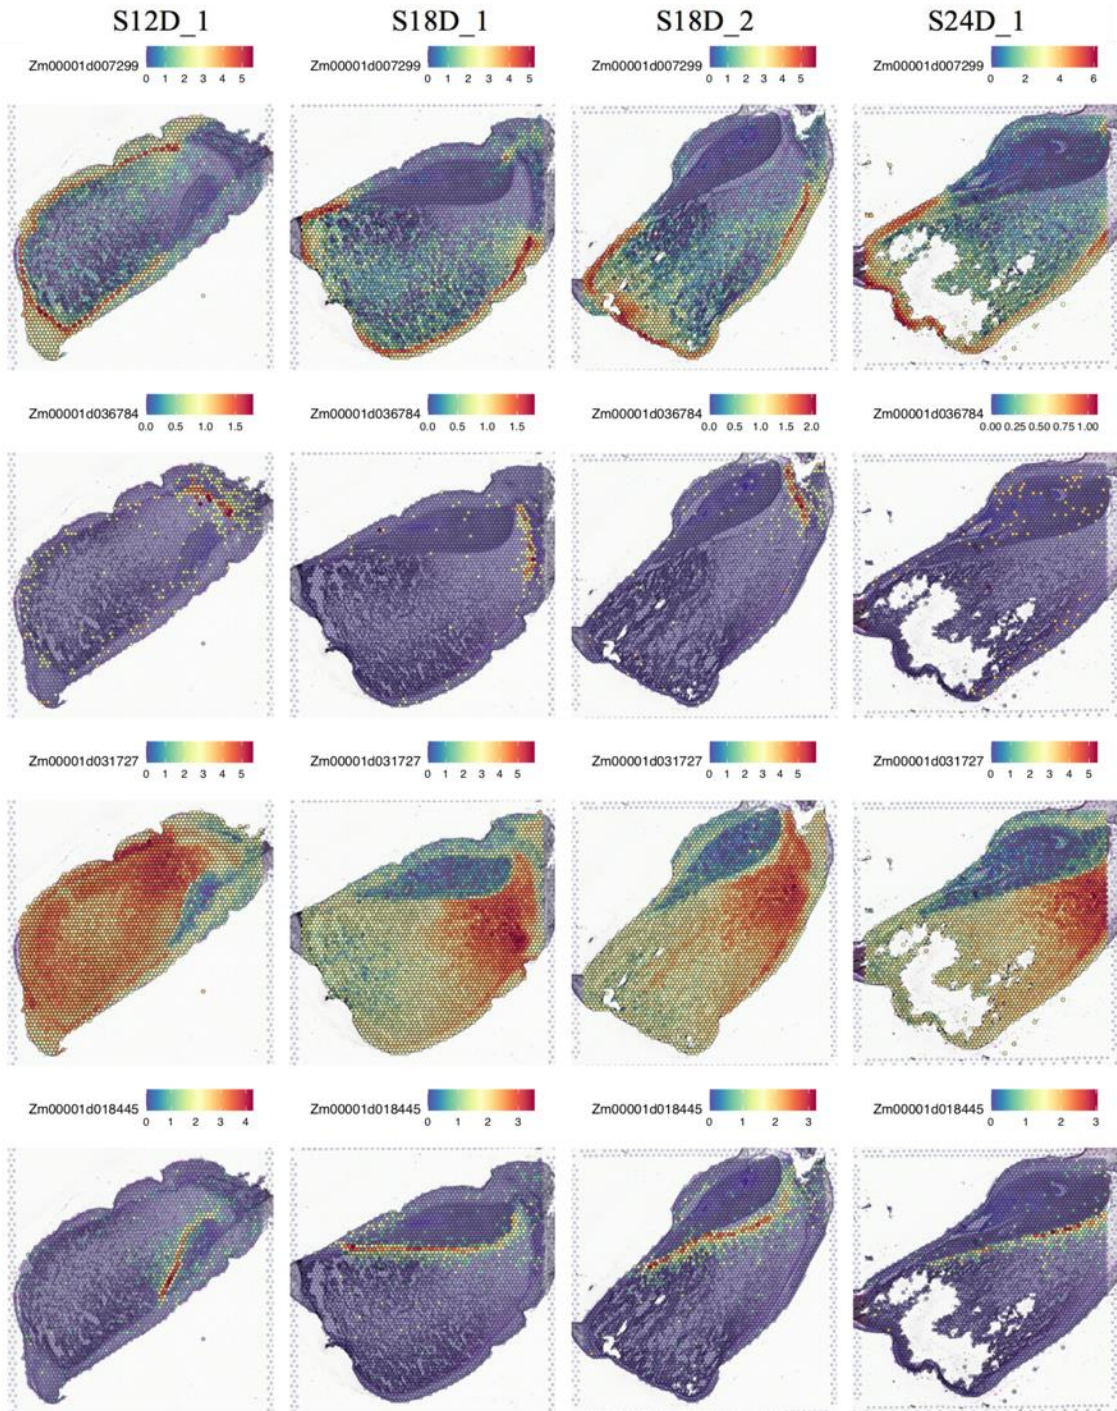

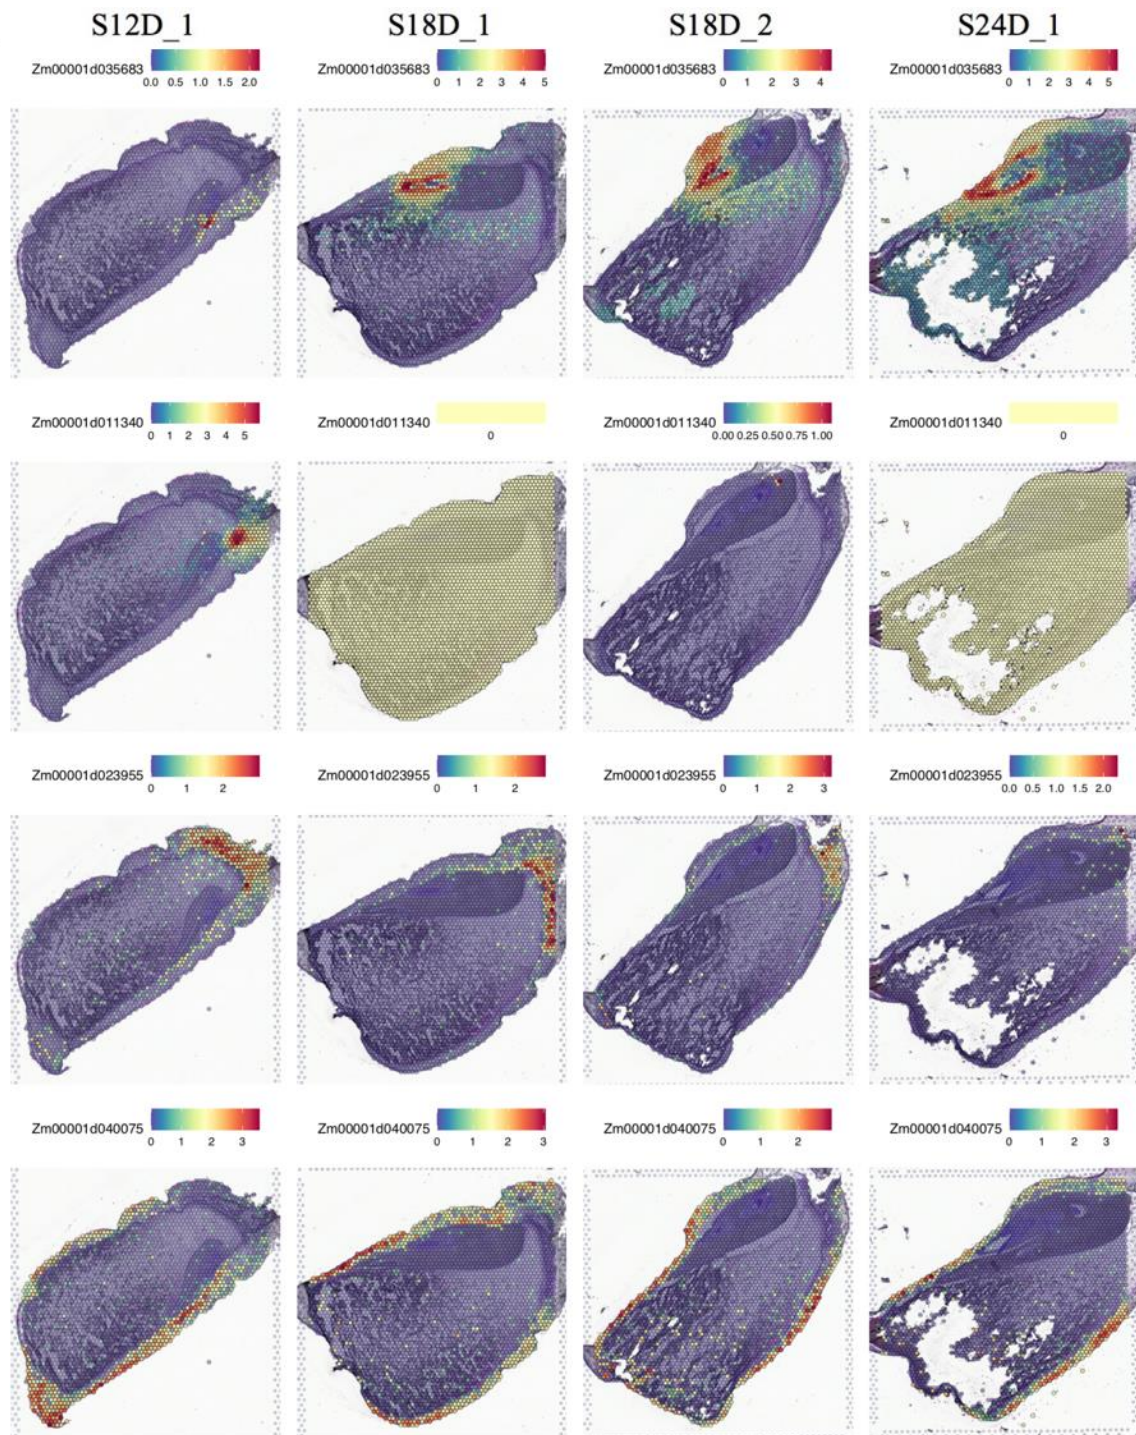

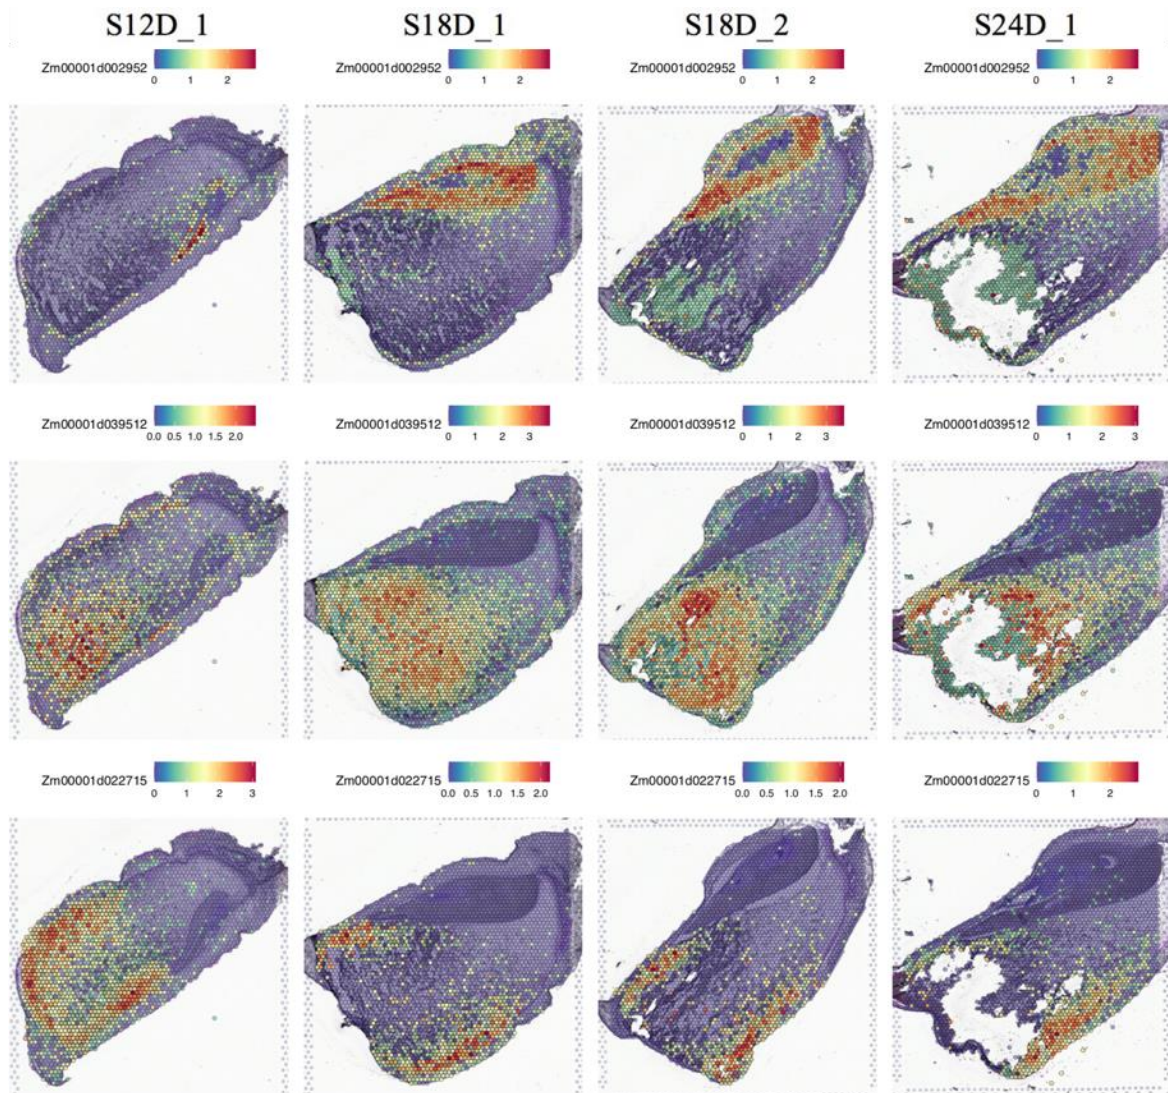

**Figure S13. Representatives of electronical RNA in situ hybridization using newly defined markers.**

We selected one marker from each compartment as following: non-specific lipid-transfer protein in AL (Zm00001d007299); potassium transporter in BETL (Zm00001d036784); sorbitol dehydrogenase in CZ (Zm00001d031727); phosphate transporter in EAS(Zm00001d018445); subtilisin-chymotrypsin inhibitor in EM (Zm00001d035683); acanthoscurrin in ESR (Zm00001d011340); MAD in PC (Zm00001d023955); glycosyltransferase in PE (Zm00001d040075); aquaporin in SCU (Zm00001d002952); hexokinase in SE (Zm00001d039512); unknown function in VE (Zm00001d022715).



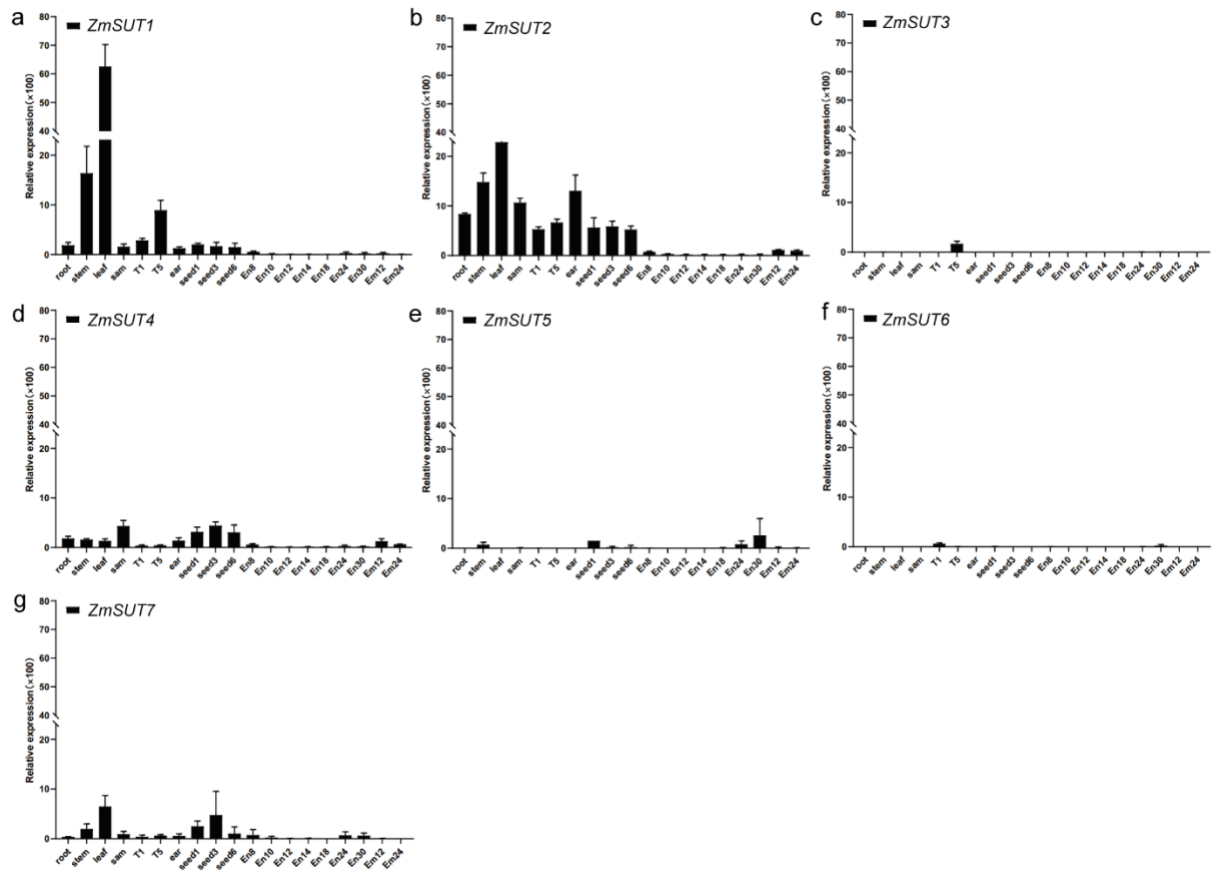

**Figure S16. The quantification of SUT gene family using qRT-PCR.**



**Table S1. The technology comparison of quantifying gene expression using next-generation sequencing in plant science.**

| Type                    | Strength                                                                                                                             | Weakness                                                                                                                                                                                                                            | Application                                                                    | Reference                           |
|-------------------------|--------------------------------------------------------------------------------------------------------------------------------------|-------------------------------------------------------------------------------------------------------------------------------------------------------------------------------------------------------------------------------------|--------------------------------------------------------------------------------|-------------------------------------|
| bulk RNA-seq            | cost-effective                                                                                                                       | lose spatial content                                                                                                                                                                                                                | average gene expression of mixed cell population                               | Chen, 2014; Yi, 2019                |
| LCM RNA-seq             | keep spatial information                                                                                                             | require prior knowledge and tissue isolation using laser capture microdissection; be a laborious procedure and limited to the yield and purity of the targeted cells; unable to dissect surrounding similar tissues from each other | average gene expression of the same cell population                            | Zhan, 2015; Doll, 2020; Zhang, 2019 |
| single-cell RNA-seq     | reach gene expression at single-cell level                                                                                           | require the formation of protoplasts that is challenging for plant cells due to the existence of cell wall; lose spatial information; rely on known molecular markers to reconstruct the cell identity                              | gene expression of single cell                                                 | Zhang, 2019; Zhang, 2021            |
| spatial transcriptomics | spatially resolved, high-resolution and high-throughput analyses of average gene expression of few cells captured by a barcoded spot | the gene expression is not equal but close to the single cell level                                                                                                                                                                 | high-throughput spatial gene expression profiles and define cell heterogeneity | Giacomello, 2017                    |

**Table S2. The statistics of sequencing data.**

Raw reads mean the numbers of generated reads from captured tissues. Reads/Spot indicates the number of reads per spot using barcode linkage. nUMI means the number of unique transcripts per spot identified by unique molecular identifiers (UMI). nGene is the number of detected genes per spot. Mit is the sequence percentage from mitochondria. Spots mean the spot number with reads because not all spots have mounted tissue cells in the capture area, leaving ~50% empty out of the total of 5,000 spots.

| Sample ID | Raw reads     | Reads/Spot | nUMI   | nGene  | Mit   | Spots  |
|-----------|---------------|------------|--------|--------|-------|--------|
| S12D_1    | 425,212,087   | 176,951    | 11,049 | 3,655  | 0.39% | 2,403  |
| S18D_1    | 413,460,518   | 136,052    | 10,901 | 3,573  | 0.47% | 3,039  |
| S18D_2    | 453,568,716   | 159,147    | 12,257 | 3,912  | 0.73% | 2,850  |
| S24D_1    | 394,951,614   | 151,439    | 11,351 | 3,792  | 1.28% | 2,608  |
| Sum       | 1,687,192,935 | 623,589    | 45,558 | 14,931 | 2.88% | 10,900 |

**Table S3. The summary of marker genes for 25 clusters from Spatial transcriptomics and the literature including RNA-seq from manual dissection or laser microdissection, as well as experimental in situ hybridization.**

| Cluster ID | Marker genes from Spatial transcriptomics      | Marker genes from RNA-seq using manual or laser laser microdissection | Marker genes using experimental in situ hybridization |
|------------|------------------------------------------------|-----------------------------------------------------------------------|-------------------------------------------------------|
| C0         | Zm00001d023955, Zm00001d052136, Zm00001d027854 | Zm00001d006669                                                        | Zm00001d027854, Zm00001d052136                        |
| C1         | Zm00001d008925, Zm00001d027291, Zm00001d017438 | Zm00001d008925, Zm00001d027291, Zm00001d017438                        | -                                                     |
| C2         | Zm00001d037382, Zm00001d015515, Zm00001d024522 | Zm00001d037382, Zm00001d015515, Zm00001d024522                        | -                                                     |
| C3         | Zm00001d024996, Zm00001d042541, Zm00001d018629 | Zm00001d024996, Zm00001d042541, Zm00001d018629                        | -                                                     |
| C4         | Zm00001d046596                                 | Zm00001d046596                                                        | -                                                     |
| C5         | Zm00001d046126                                 | Zm00001d046126                                                        | Zm00001d046126                                        |
| C6         | Zm00001d020395, Zm00001d033447                 | Zm00001d020395, Zm00001d033447                                        | -                                                     |
| C7         | Zm00001d049179, Zm00001d048643                 | Zm00001d049179, Zm00001d048643                                        | -                                                     |
| C8         | Zm00001d033905, Zm00001d041489, Zm00001d035439 | Zm00001d033905, Zm00001d041489                                        | Zm00001d035439                                        |
| C9         | Zm00001d041822, Zm00001d052759, Zm00001d019277 | Zm00001d041822, Zm00001d052759                                        | Zm00001d041822                                        |
| C10        | Zm00001d007299, Zm00001d012572, Zm00001d020938 | Zm00001d012572, Zm00001d020938                                        | Zm00001d046599, Zm00001d012572                        |
| C11        | Zm00001d050577, Zm00001d017285, Zm00001d037439 | Zm00001d050577, Zm00001d017285, Zm00001d037439                        | Zm00001d050577, Zm00001d017285, Zm00001d037439        |
| C12        | Zm00001d009292, Zm00001d013159                 | Zm00001d009292, Zm00001d013159                                        | Zm00001d009292, Zm00001d013159                        |
| C13        | Zm00001d003677, Zm00001d013159                 | Zm00001d003677, Zm00001d013159                                        | Zm00001d013159                                        |
| C14        | Zm00001d029696, ENSRNA049478426                | -                                                                     | Zm00001d037498                                        |
| C15        | Zm00001d051653, Zm00001d033714, Zm00001d043610 | -                                                                     | Zm00001d009646                                        |
| C17        | Zm00001d028714                                 | Zm00001d028714                                                        | -                                                     |
| C16        | Zm00001d018727                                 | Zm00001d018727                                                        | -                                                     |
| C18        | Zm00001d013956, Zm00001d022464, Zm00001d040127 | -                                                                     | -                                                     |
| C19        | Zm00001d048808                                 | Zm00001d048808                                                        | Zm00001d048808                                        |
| C20        | Zm00001d020591                                 | Zm00001d020591                                                        | Zm00001d020591                                        |
| C21        | Zm00001d030855, Zm00001d035760                 | Zm00001d030855, Zm00001d035760                                        | Zm00001d030855, Zm00001d035760                        |
| C22        | Zm00001d045937                                 | Zm00001d045937                                                        | Zm00001d045937                                        |
| C23        | Zm00001d025343                                 | -                                                                     | -                                                     |
| C24        | Zm00001d027819, Zm00001d020780, Zm00001d011342 | Zm00001d027819, Zm00001d020780, Zm00001d011342                        | Zm00001d027819                                        |

**Table S4. Spot number in clusters after dimensionality reduction.**

The number is the spot number within the corresponding cluster.

| Cluster | S12D_1 | S18D_1 | S18D_2 | S24D_1 | Sum   | Compartment | Genotype  |
|---------|--------|--------|--------|--------|-------|-------------|-----------|
| c0      | 181    | 201    | 101    | 19     | 502   | PC          | maternal  |
| c1      | 196    | 192    | 130    | 150    | 668   | PE          | maternal  |
| c2      | 155    | 88     | 111    | 84     | 438   | PE          | maternal  |
| c3      | 120    | 45     | 67     | 65     | 297   | PE          | maternal  |
| c4      | 50     | 147    | 176    | 210    | 583   | SCU         | embryo    |
| c5      | 9      | 78     | 64     | 120    | 271   | SCU         | embryo    |
| c6      | 21     | 92     | 71     | 118    | 302   | SCU         | embryo    |
| c7      | 20     | 56     | 79     | 110    | 265   | EM          | embryo    |
| c8      | 27     | 29     | 69     | 112    | 237   | EM          | embryo    |
| c9      | 72     | 70     | 72     | 12     | 226   | BETL        | endosperm |
| c10     | 150    | 80     | 93     | 79     | 402   | AL          | endosperm |
| c11     | 32     | 51     | 77     | 58     | 218   | EAS         | endosperm |
| c12     | 61     | 98     | 107    | 89     | 355   | CZ          | endosperm |
| c13     | 97     | 91     | 70     | 58     | 316   | CZ          | endosperm |
| c14     | 245    | 178    | 176    | 137    | 736   | SE          | endosperm |
| c15     | 108    | 177    | 230    | 155    | 670   | SE          | endosperm |
| c16     | 140    | 455    | 291    | 293    | 1179  | SE          | endosperm |
| c17     | 146    | 181    | 115    | 95     | 537   | SE          | endosperm |
| c18     | 54     | 82     | 169    | 122    | 427   | SE          | endosperm |
| c19     | 119    | 198    | 201    | 140    | 658   | VE          | endosperm |
| c20     | 155    | 125    | 113    | 119    | 512   | VE          | endosperm |
| c21     | 89     | 161    | 133    | 147    | 530   | VE          | endosperm |
| c22     | 80     | 98     | 85     | 49     | 312   | VE          | endosperm |
| c23     | 58     | 66     | 50     | 67     | 241   | VE          | endosperm |
| c24     | 18     | 0      | 0      | 0      | 18    | ESR         | endosperm |
| Sum     | 2403   | 3039   | 2850   | 2608   | 10900 |             |           |

**Table S5. GO enrichments for WGCNA modules.**

| Module | Colour      | Population | Gene numbers | GO enrichment                                       |
|--------|-------------|------------|--------------|-----------------------------------------------------|
| M1     | black       | EAS        | 151          | carbohydrate transport                              |
| M2     | blue        | SCU        | 443          | fatty acid biosynthetic process                     |
| M3     | brown       | BETL       | 375          | ion transmembrane transporter activity              |
| M4     | green       | EM         | 208          | DNA replication                                     |
| M5     | greenyellow | PE         | 115          | cell wall biogenesis; oxylipin metabolic process    |
| M6     | magenta     | AL         | 131          | cellular amino acid metabolic process               |
| M7     | pink        | VE         | 90           | nutrient reservoir activity                         |
| M8     | purple      | CZ         | 112          | cell-cell junction; plasmodesma; symplast; apoplast |
| M9     | red         | SE         | 144          | starch biosynthetic process                         |
| M10    | turquoise   | PC         | 220          | positive regulation of transcription                |
| M11    | yellow      | ESR        | 337          | coenzyme binding                                    |

**Table S6. The comparison of defined markers between LCM and Spatial transcriptome.** The markers from previous study of laser-capture microdissection (LCM) was utilized from Zhan et al. 2015.

| Gene ID        | ST     |       |        |        |       |       |        |       |       |        |        |        |            | LCM              |                 | Gene function                                                    |
|----------------|--------|-------|--------|--------|-------|-------|--------|-------|-------|--------|--------|--------|------------|------------------|-----------------|------------------------------------------------------------------|
|                | AL     | BETL  | CZ     | EAS    | ESR   | PC    | PE     | EM    | SCU   | SE     | VE     | max    | Population | Highest CS score | Compartment     |                                                                  |
| Zm00001d012572 | 62.28  | 3.69  | 3.4    | 0.18   | 44.28 | 10.93 | 10.12  | 0.84  | 0.7   | 1.01   | 3.3    | 62.28  | AL         | 0.51             | AL              | aleurone9                                                        |
| Zm00001d015569 | 4.74   | 0.22  | 0.6    | 0.53   | 0.78  | 0.94  | 0.72   | 0.45  | 0.51  | 0.13   | 0.33   | 4.74   | AL         | 0.70             | AL              | vacuolar H <sup>+</sup> -translocating inorganic pyrophosphatase |
| Zm00001d000161 | 0.19   | 47.23 | 2.84   | 0.4    | 0.33  | 4.33  | 0.17   | 0.08  | 0.23  | 0.08   | 0.07   | 47.23  | BETL       | 0.97             | BETL            | basal endosperm transfer layer 4 (BETL4)                         |
| Zm00001d003776 | 0.08   | 30.57 | 0.75   | 0.18   | 1.56  | 3.08  | 0.15   | 0.02  | 0.08  | 0.05   | 0.04   | 30.57  | BETL       | 0.95             | BETL            | sucrose degrading enzyme (CWIN2, mn1)                            |
| Zm00001d009292 | 0.41   | 1     | 6.3    | 2.4    | 0.17  | 0.43  | 0.64   | 0.07  | 0.09  | 3.21   | 5      | 6.3    | CZ         | 0.70             | CZ              | PLATZ transcription factor (floury3)                             |
| Zm00001d021289 | 1.77   | 2.77  | 9.47   | 3.96   | 0.28  | 0.83  | 1.66   | 0.19  | 0.19  | 5.71   | 9.06   | 9.47   | CZ         | 0.70             | CZ              | late embryonic protein                                           |
| Zm00001d002705 | 0.2    | 0.25  | 0.45   | 2.56   | 0.06  | 0.13  | 0.11   | 0.01  | 0.11  | 0.04   | 0.28   | 2.56   | EAS        | 0.65             | CSE (VEandSE)   | ATP dependent copper transporter                                 |
| Zm00001d005914 | 0.16   | 0.08  | 0.22   | 1.86   | 0     | 0.33  | 0.2    | 0.25  | 0.37  | 0.03   | 0.04   | 1.86   | EAS        | 0.62             | EM (EMandSCU)   | sugars will eventually be exported transporter4b                 |
| Zm00001d037985 | 0.05   | 0.26  | 0.74   | 1.3    | 0     | 0.55  | 4.98   | 29.36 | 5.36  | 0.61   | 0.34   | 29.36  | EM         | 0.94             | EM (EMandSCU)   | late EMryonic protein; EMryo specific protein5                   |
| Zm00001d043049 | 0.03   | 0.17  | 0.6    | 2.12   | 1.22  | 0.31  | 4.5    | 19.05 | 2.64  | 0.34   | 0.2    | 19.05  | EM         | 0.81             | EM (EMandSCU)   | non-specific lipid-transfer protein                              |
| Zm00001d027819 | 0.02   | 5.94  | 1.22   | 0.07   | 31.44 | 0.59  | 0.2    | 0.04  | 0.04  | 0.01   | 0.01   | 31.44  | ESR        | 0.99             | ESR             | emryo surrounding region 2                                       |
| Zm00001d053112 | 0.06   | 7.56  | 1.19   | 0.07   | 13.61 | 1.47  | 0.14   | 0.03  | 0.06  | 0.02   | 0.02   | 13.61  | ESR        | 0.99             | ESR             | emryo surrounding region 6                                       |
| Zm00001d025373 | 0      | 1.21  | 0.06   | 0.01   | 0     | 1.79  | 0.02   | 0     | 0.02  | 0      | 0      | 1.79   | PC         | 0.32             | PC              | aluminum-activated malate transporter 8                          |
| Zm00001d048611 | 0.78   | 0.8   | 0.12   | 0.02   | 0.06  | 7.86  | 4.56   | 0.06  | 0.02  | 0.38   | 0.06   | 7.86   | PC         | 0.85             | PC              | metallothionein-like protein 1B                                  |
| Zm00001d020583 | 0.2    | 0.03  | 0.02   | 0.03   | 0     | 0.39  | 1.01   | 0.03  | 0.04  | 0.02   | 0.02   | 1.01   | PE         | 0.95             | PE              | galactosyltransferase family protein                             |
| Zm00001d038476 | 0.15   | 0.02  | 0.02   | 0.02   | 0     | 0.11  | 1.25   | 0.01  | 0.01  | 0.05   | 0.03   | 1.25   | PE         | 0.89             | PE              | alpha expansin5                                                  |
| Zm00001d026317 | 0.03   | 0.35  | 0.5    | 1.58   | 1.67  | 0.43  | 0.45   | 1.62  | 5.25  | 0.18   | 0.14   | 5.25   | SCU        | 0.94             | EM (EM andSCU)  | Transcription factor PIF4                                        |
| Zm00001d019504 | 1.02   | 0.26  | 1.15   | 3.64   | 8.56  | 1.26  | 2.18   | 7.47  | 10.92 | 0.77   | 0.42   | 10.92  | SCU        | 0.91             | EM (EM and SCU) | plasma membrane associated protein;tonoplast intrinsic proteins  |
| Zm00001d045042 | 9.82   | 0.72  | 7.85   | 3.04   | 0.11  | 2.21  | 8.02   | 1.59  | 0.64  | 67.57  | 36.04  | 67.57  | SE         | 0.89             | CSE (VEandSE)   | sucrose synthase 1 (sh1)                                         |
| Zm00001d050032 | 1.77   | 0.2   | 1.34   | 0.47   | 0.44  | 0.79  | 2.12   | 0.29  | 0.11  | 19.84  | 10.4   | 19.84  | SE         | 0.88             | CSE (VEandSE)   | glucose-1-phosphate adenylyltransferase (bt2)                    |
| Zm00001d020592 | 454.82 | 15.17 | 191.28 | 153.4  | 3.22  | 12.36 | 198.52 | 9.51  | 19.3  | 505.1  | 771.71 | 771.71 | VE         | 0.96             | CSE (VEandSE)   | 27-kD y-zein                                                     |
| Zm00001d005793 | 268.27 | 7.19  | 80.4   | 162.01 | 2.06  | 7.6   | 120.84 | 6.38  | 16.24 | 366.71 | 483    | 483    | VE         | 0.95             | CSE (VEandSE)   | 16-kD y-zein (mucronate1)                                        |

**Table S7. Primers for RNA in situ hybridization.**

| Figure | Gene ID        | Name                | Description                                            | Primer-F                            | Primer-R                           |
|--------|----------------|---------------------|--------------------------------------------------------|-------------------------------------|------------------------------------|
| Fig.2a | Zm00001d048847 | 19KD $\alpha$ -zein | zpl2a - zein polypeptidesL2a                           | 19KD-F1: CACAAGCTCCTATAGCTTCCTT     | 19KD-R1: AATGTTGCTGTGCAAGAAGGC     |
| Fig.2c | Zm00001d049476 | 19KD $\alpha$ -zein | z1A-1 - alpha zein 19kDa A-1                           | 19KD-F2: CTGCTACCGGACCATTTTC        | 19KD-R2: GTGTCAAGAAGGCAGCAGGG      |
| Fig.2e | Zm00001d048848 | 19KD $\alpha$ -zein | z1A-3 - alpha zein 19kDa A-3                           | 19KD-F3: TCCTCCAACAATCATCAGCCCTA    | 19KD-R3: TTGGTAGAACACTGCTGGGTTTG   |
| Fig.2g | Zm00001d018727 | psk1                | phytosulfokine peptide precursor 1                     | ST19-F1: CATTTCCTTCTTCCATGGCG       | ST19-R1: GGCCGGAGACTCTTCTCTTTATT   |
| Fig.2i | Zm00001d031727 | sdh1                | sorbitol dehydrogenase homolog 1                       | ZmST10-F2: CGTGGCTGGTGGCCAAGAAC     | ZmST10-R2: TCATGTCTCCGACACAGGTTG   |
| Fig.2k | Zm00001d002705 | hma5                | heavy metal ATPase5                                    | ZmST8-F1: CTCGTCTCGGAGAACAAAATTACC  | ZmST8-R1: AGCTGCTCGAAGAAGTGAAGTAAA |
| Fig.2m | Zm00001d002768 | ole1                | oleosin 1                                              | ZmST11-F2: CTCGTAGTCTGTAGCTCAAGCATC | ZmST11-R1: CTCGCAAGAAAGAGAGACGCATA |
| Fig.2o | Zm00001d043049 | plt3                | putative lipid-transfer protein 3                      | ZmST12-F2: CCTGCCCTGCCATCATATCG     | ZmST12-R2: TGCAGTTAACGTTGGTGCTG    |
| Fig.2q | Zm00001d052136 | Acco20              | oxidase20/1-aminocyclopropane-1-carboxylate oxidase 20 | ZmST5-F1: AAGTGATGAAGCAGTTCGCATC    | ZmST5-R1: CATTCCACGATACACGCATAACC  |
| Fig.2s | Zm00001d038558 | Cc3                 | Corn Cystatin (CC3)                                    | ZmST6-F1: GATCGATGGCTGAGGTACACAAT   | ZmST6-R1: AGGCTTTCAGATCTCTTAGCACA  |
| Fig.2u | Zm00001d000161 | bet4                | basal endosperm transfer layer4                        | ZmST17-F1: TTCACGCGTTCAAAGATGCG     | ZmST17-R1: GCCTCCGAACCTCCATTAGCA   |
| Fig.2w | Zm00001d007299 | LTP                 | probable non-specific lipid-transfer protein 2         | ST23-F1: CGACCAACTAACACAGCTCAG      | ST23-R1: AACGAAAGCTCTACATGATCCA    |

**Table S8. Primers for qRT-PCR.**

| Name  | Description           | Primer-F              | Primer-R                |
|-------|-----------------------|-----------------------|-------------------------|
| actin | actin                 | GCTACGAGATGCCTGATGGTC | CCCCCACTGAGGACAACG      |
| sut1  | sucrose transporter 1 | GCGATAGGTGCACAGCAAGA  | TCGGACGAGAAGCCAACAAC    |
| sut2  | sucrose transporter 2 | GCCCTGGGAAACATACTTGGA | TGTCAAGAAGAAAGGCAGACTTA |
| sut3  | sucrose transporter 3 | GTGATGGGATTCTGGCTGCT  | CACGACACGAAGATGGCGTT    |
| sut4  | sucrose transporter 4 | TCGCTGAAGAGAGCCCACTA  | GGTTCATTGTATGCATGGGCA   |
| sut5  | sucrose transporter 5 | CGAGTGGGCCACCTTGAACAT | GACCATGCAGGCCAAGAAGAG   |
| sut6  | sucrose transporter 6 | GCAGACAGGGTTTGGTCTCT  | CTTGTGAGGGATCCGAAAAGC   |
| sut7  | sucrose transporter 7 | CAGCTGGCGGAGCTGTC     | GCCCAGCCGTACTGCAC       |

### **Exploring the online resource and visualizing electronical RNA in situ hybridization**

The website (<http://119.78.67.206:3838/>) is dedicated to visualizing electronical RNA in situ hybridization images of the tissue sections from the maize inbred line W64A. On the main interface of the webpage, you will find a demonstration examples that utilizes known marker gene.

To retrieve specific electronical in situ images, simply enter a gene ID (e.g., Zm00001d012572) into the search box. After submitting the gene ID, it may take approximately 10 seconds to 2 minutes, depending on your internet connection, to retrieve the results. You will receive four electronical in situ images corresponding to different developmental stages of the maize kernel.

The "slice1" image represents the maize kernel at 12 days after pollination (DAP), while "slice1.1" and "slice1.2" are two biological replicates, representing the maize kernel at 18 DAP. Additionally, "slice1.3" represents the maize kernel at 24 DAP.

Please note that the gene ID used is based on the B73v4 reference genome. If you have gene IDs from other versions, please visit maizeGDB to convert them accordingly.
